# Supplementary material
Source: MDPI journal article supplement (https://www.mdpi.com/1999-4907/8/5/148)
Supplement: s1 [file s1]

**Table S1.** *F* values of two-way repeated measures ANOVA of the effects of drought and ozone throughout daytime on CO<sub>2</sub> assimilation rate (*A*), stomatal conductance to water vapor (*g<sub>s</sub>*), intercellular CO<sub>2</sub> concentration (*C<sub>i</sub>*), potential PSII photochemical activity (*F<sub>v</sub>/F<sub>m</sub>*), actual PSII photochemical activity ( $\Phi_{\text{PSII}}$ ), photochemical (*qP*), and non photochemical quenching (*qNP*) in *Quercus cerris* plants. Asterisks show the significance of factors/interaction: \*\*\* *p* ≤ 0.001, \*\* *p* ≤ 0.01, \* *p* ≤ 0.05, ns *p* > 0.05. d.f. represents the degrees of freedom.

| Effects                       | d.f. | <i>A</i>       | <i>g<sub>s</sub></i> | <i>C<sub>i</sub></i> | <i>F<sub>v</sub>/F<sub>m</sub></i> | <i>qP</i>     | <i>qNP</i>   |
|-------------------------------|------|----------------|----------------------|----------------------|------------------------------------|---------------|--------------|
| Drought                       | 1    | 1100.11<br>*** | 800.65<br>***        | 0.16<br>ns           | 124.89<br>***                      | 199.55<br>*** | 87.84<br>*** |
| Ozone                         | 1    | 5.23<br>*      | 39.97<br>***         | 1.24<br>ns           | 0.44<br>ns                         | 19.87<br>***  | 4.38<br>ns   |
| Time of day                   | 9    | 138.93<br>***  | 9.77<br>***          | 56.42<br>***         | 19.34<br>***                       | 50.63<br>***  | 41.99<br>*** |
| Drought × Ozone               | 1    | 21.78<br>***   | 33.09<br>***         | 12.56<br>***         | 0.16<br>ns                         | 0.00<br>ns    | 17.51<br>**  |
| Drought × Time of day         | 9    | 27.98<br>***   | 4.91<br>***          | 4.47<br>**           | 6.36<br>***                        | 1.06<br>Ns    | 1.10<br>ns   |
| Ozone × Time of day           | 9    | 1.60<br>ns     | 1.04<br>ns           | 3.32<br>**           | 0.90<br>ns                         | 3.98<br>**    | 0.84<br>ns   |
| Drought × Ozone × Time of day | 9    | 1.96<br>ns     | 0.56<br>ns           | 1.65<br>ns           | 0.65<br>ns                         | 0.25<br>ns    | 4.35<br>**   |

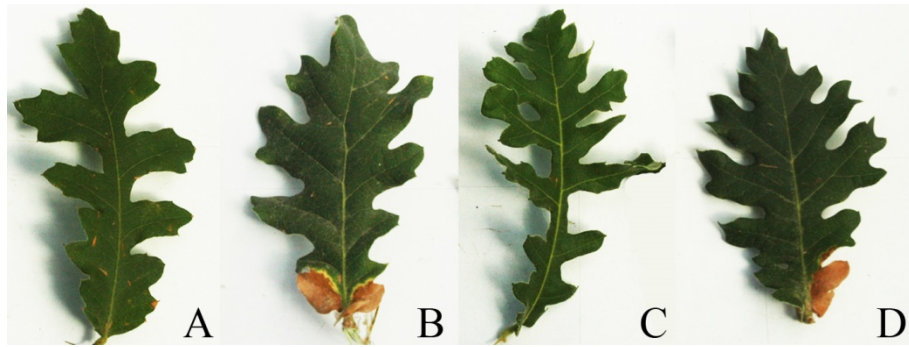

**Figure S1.** Symptoms in leaves of *Quercus cerris* water stressed and exposed to charcoal filtered air (WS/O<sub>3</sub><sup>-</sup>); regularly irrigated and O<sub>3</sub> fumigated (WW/O<sub>3</sub><sup>+</sup>); water stressed and O<sub>3</sub> fumigated (WS/O<sub>3</sub><sup>+</sup>). Controls were regularly irrigated to maximum soil water holding capacity and exposed to charcoal filtered air (WW/O<sub>3</sub><sup>-</sup>).

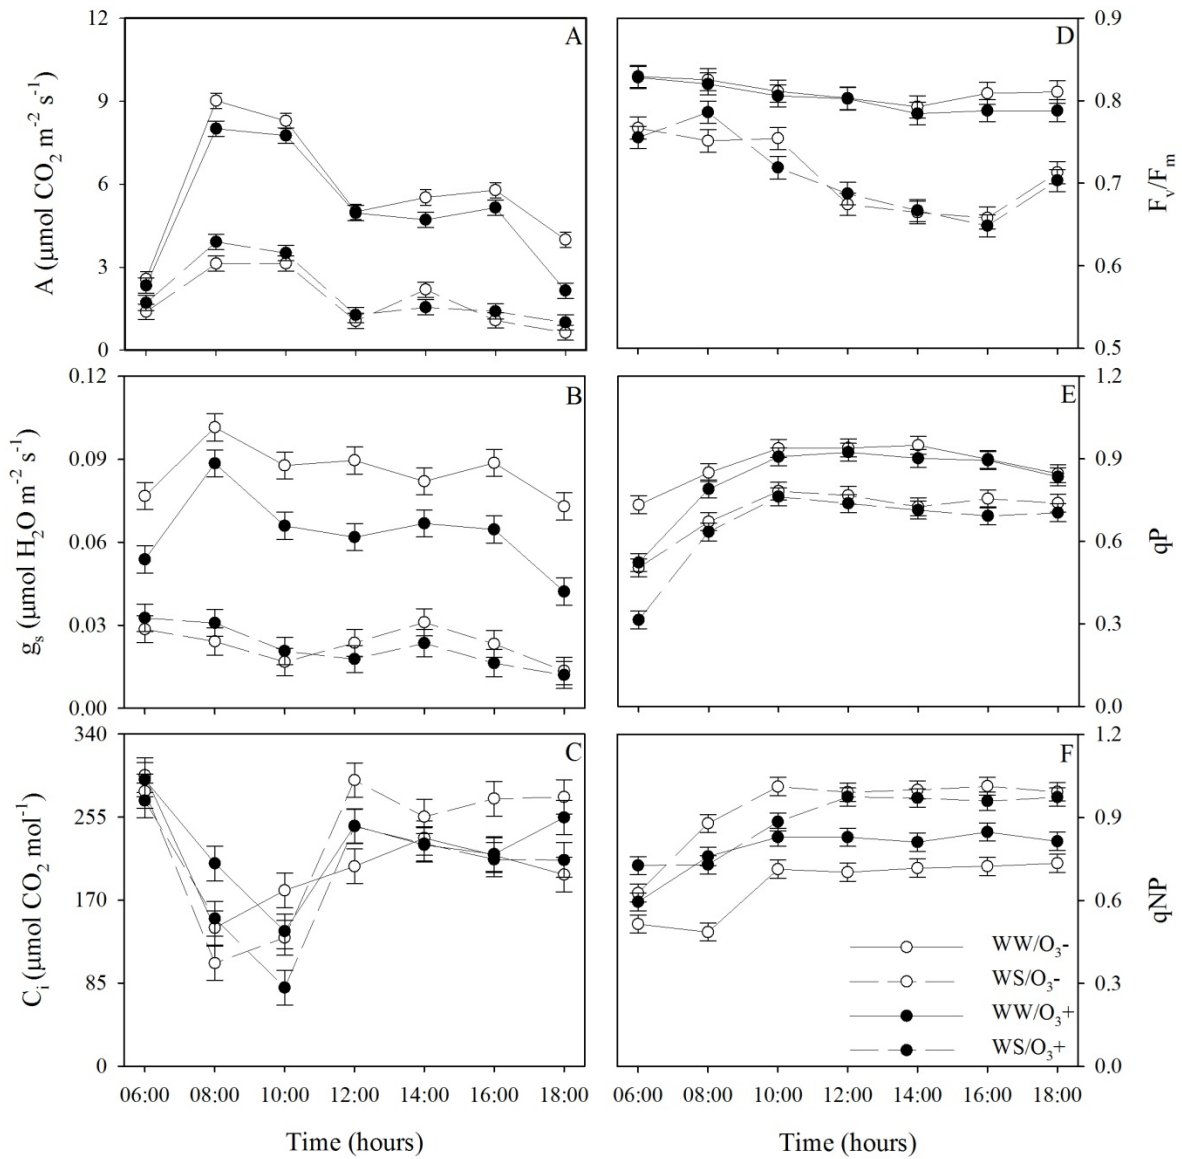

**Figure S2.** Diurnal profiles of foliar leaf gas exchange and chlorophyll fluorescence parameters in *Quercus cerris* plants (i) regularly irrigated to maximum soil water holding capacity and exposed to charcoal filtered air (WW/O<sub>3</sub><sup>-</sup>); (ii) water stressed and exposed to charcoal filtered air (WS/O<sub>3</sub><sup>-</sup>); (iii) regularly irrigated and O<sub>3</sub> fumigated (WW/O<sub>3</sub><sup>+</sup>); (iv) water stressed and O<sub>3</sub> fumigated (WS/O<sub>3</sub><sup>+</sup>). Data are shown as mean ± standard error (*n* = 3). Abbreviations: A, CO<sub>2</sub> assimilation rate; g<sub>s</sub>, stomatal conductance to water vapor; C<sub>i</sub>, intercellular CO<sub>2</sub> concentration; Φ<sub>PSII</sub>, actual PSII photochemical activity; qP, photochemical quenching coefficient; qNP, no photochemical quenching coefficient.
